# Supplementary material
Source: Springer Nature journal article supplement (https://www.springermedizin.de/resource/supplementary/12936_2012_2579_MOESM1_ESM.pdf/9543262)

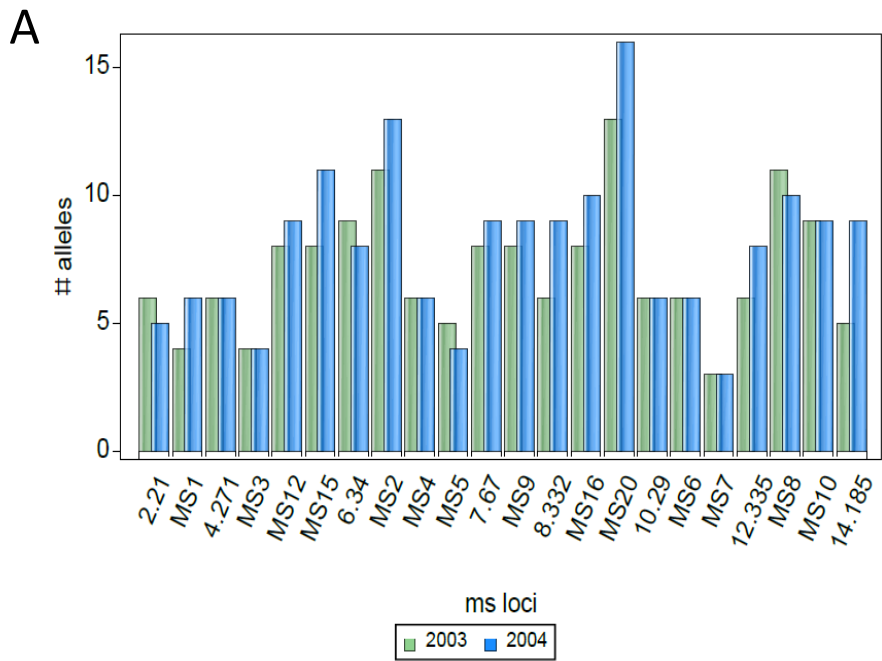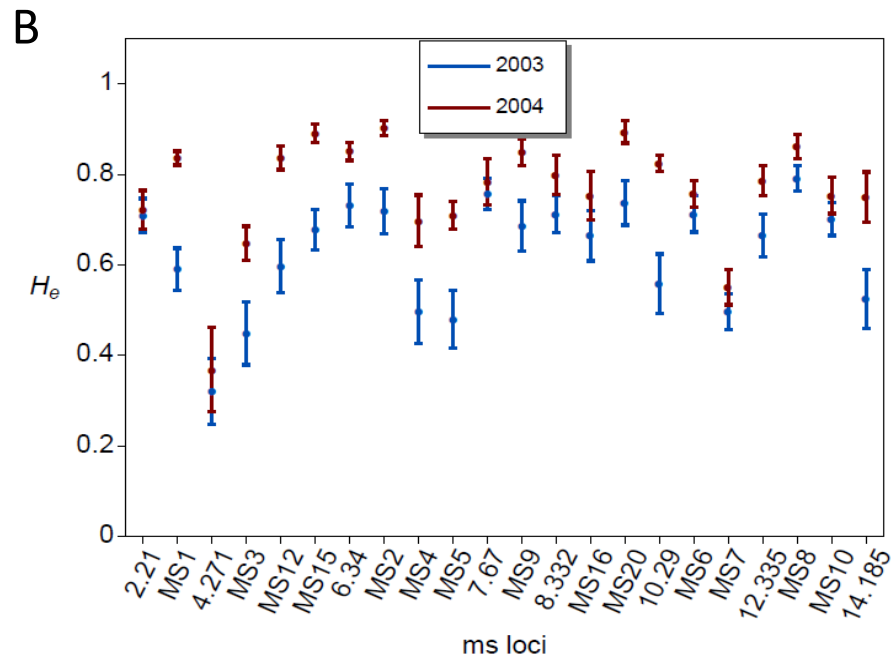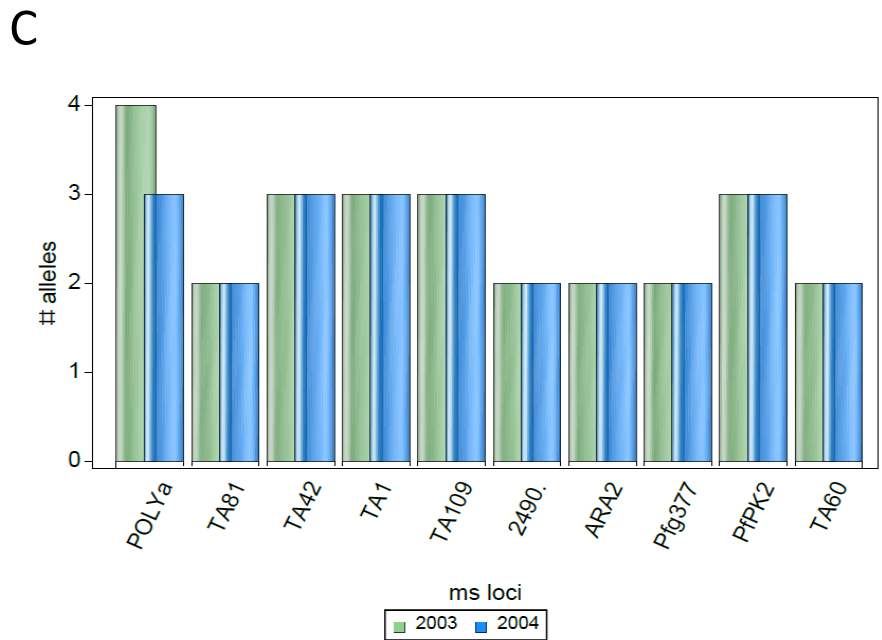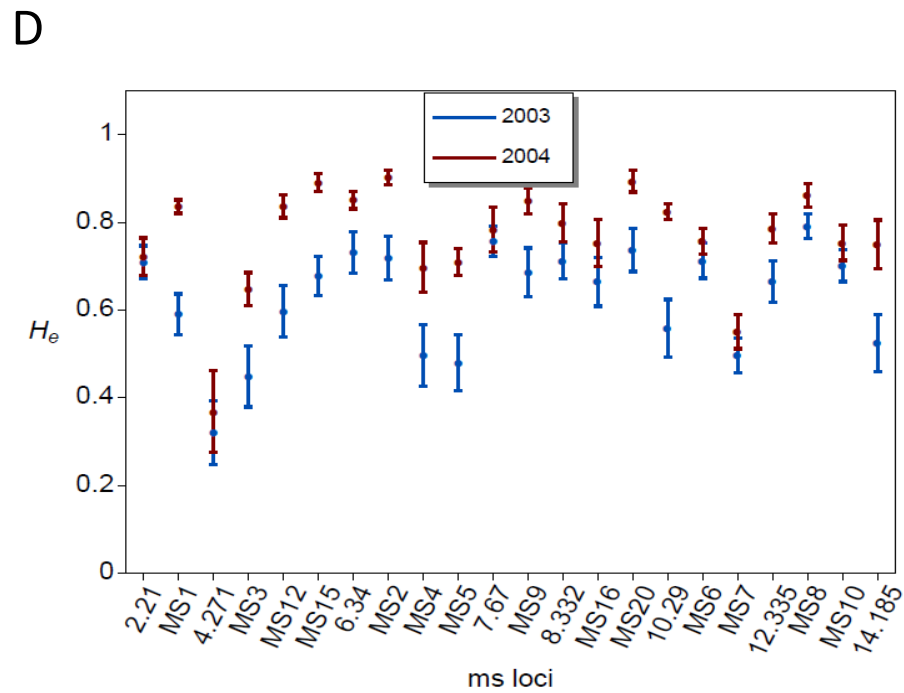

Supplement: MOESM1 [file 9543262]
